# Supplementary material for: Novel Water-in-Oil Emulsions for Co-Loading Sialic Acid and Chitosan: Formulation, Characterization, and Stability Evaluation
Source: MDPI journal article supplement (doi:10.3390/foods11060873), 2022-03-18
Supplement: s1 [file s1]

**Table S1.** Fatty acids composition of olive oil and maize oil.

| C chain | Fatty acid             | Olive oil<br>composition/% | Maize oil<br>composition/ |
|---------|------------------------|----------------------------|---------------------------|
| 16:0    | Palmitic acid          | 10.390                     | 12.536                    |
| 16:1    | Palmitoleic acid       | 0.804                      |                           |
| 18:0    | Stearic acid           | 3.690                      | 1.714                     |
| 18:1    | Oleic acid             | 73.323                     | 30.356                    |
| 18:2    | Linoleic acid          | 10.030                     | 53.244                    |
| 18:3    | Gamma linolenic acid   |                            | 0.592                     |
| 18:3    | Alpha linolenic acid   | 0.720                      | 0.686                     |
| 20:0    | Arachidic acid         | 0.419                      | 0.404                     |
| 20:1    | Cis-11-Eicosenoic acid | 0.262                      | 0.335                     |
| 22:0    | behenic acid           | 0.164                      |                           |
| 24:0    | lignoceric acid        |                            | 0.132                     |
| 22:6    | DHA                    | 0.199                      |                           |
|         | SFA                    | 14.662                     | 14.787                    |
|         | UFA                    | 85.338                     | 85.213                    |
|         | MUFA                   | 74.389                     | 30.691                    |
|         | PUFA                   | 10.948                     | 54.522                    |

Measurements:

The fatty acid composition of olive oil and maize oil was measured using a gas chromatograph (Agilent Technologies, 7890A GC system) equipped with a hydrogen flame detector.

50-55 mg of oil and 2 mL of 0.5 M sodium hydroxide methanol solution were added into a circular bottom centrifuge tube of 15mL, and reacted in boiling water until the grease disappears. Then, 2 mL of boron trifluoride methanol solution was added into the circular bottom centrifuge tube and continued to react in boiling water for 3 minutes. 2 mL of saturated NaCl solution and 2 mL of n-hexane would be poured into a circular bottom centrifuge tube after cooling at room temperature and mixed evenly by vortex oscillation. Absorb the Organic phase was filtered into the injection bottle with Organic filter membrane with pore size of 0.22  $\mu\text{m}$ , and the samples were stored at -20  $^{\circ}\text{C}$  for gas chromatographic analysis.

Chromatographic column is DB-WAX capillary column (30 m  $\times$  0.25 mm  $\times$  0.25  $\mu\text{m}$ ). carrier gas is  $\text{N}_2$  (purity  $\geq$  99.9%) and the flow rate was 0.8 mL/min. The temperature of injector and detector are 230  $^{\circ}\text{C}$  and 240  $^{\circ}\text{C}$ , respectively. The injection volume is 1  $\mu\text{L}$  and split ratio is 50:1. The initial temperature of the oven is 60  $^{\circ}\text{C}$  and keep it for 2 minutes, then heated to 200  $^{\circ}\text{C}$  at 15  $^{\circ}\text{C}/\text{min}$ , and then heated to 230  $^{\circ}\text{C}$  at 3  $^{\circ}\text{C}/\text{min}$  and kept for 25 minutes.

The composition of different fatty acids in the product was calculated according to the Eq. (1).

$$\text{Fatty acid ratio (\%)} = \frac{\text{Peak area of fatty acid to be analyzed}}{\text{Peak area of all of fatty acid}} \times 100 \quad (1)$$
